# Supplementary material for: Characterization of Physicians That Might Be Reluctant to Propose HIV Cure-Related Clinical Trials with Treatment Interruption to Their Patients? The ANRS-APSEC Study
Source: MDPI journal article supplement (doi:10.3390/vaccines8020334), 2020-06-23
Supplement: s1 [file s1]

Article

# Characterization of Physicians That Might Be Reluctant to Propose HIV Cure-Related Clinical Trials with Treatment Interruption to Their Patients? The ANRS-APSEC Study

Christel Protiere <sup>1,\*</sup> Lisa Fressard <sup>2</sup>, Marion Mora <sup>3</sup>, Laurence Meyer <sup>4</sup>, Marie Préau <sup>5</sup>, Marie Suzan-Monti <sup>6</sup>, Jean-Daniel Lelièvre <sup>7</sup>, Olivier Lambotte <sup>8</sup>, Bruno Spire <sup>9</sup> and the APSEC study group

Supplementary files

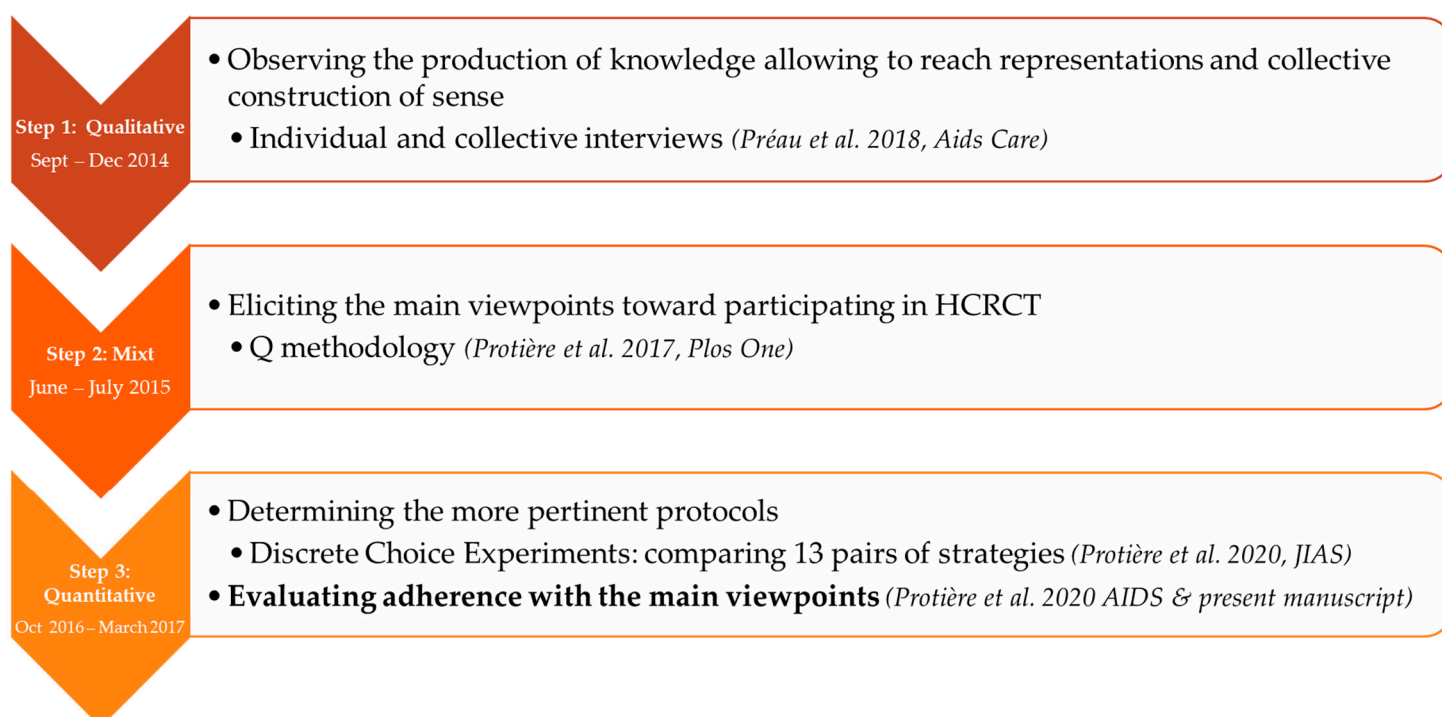

**Figure S1:** Description of the three steps of the ANRS-APSEC study.

**Table S1.** Description of physicians' characteristics (ANRS-APSEC study, n=164).

|                                                      | N   | %*          |
|------------------------------------------------------|-----|-------------|
| <b>Identity and sociodemographic characteristics</b> |     |             |
| Gender                                               |     |             |
| Man                                                  | 80  | 48.78       |
| Woman                                                | 84  | 51.22       |
| Age (29; 74 years)                                   | 164 | 50 (41; 57) |
| In a relationship                                    |     |             |
| Yes                                                  | 131 | 79.88       |
| No                                                   | 33  | 20.12       |
| Felt part of the LGBT community                      |     |             |
| Yes                                                  | 15  | 9.15        |

|                                                                                  | N   | %*          |
|----------------------------------------------------------------------------------|-----|-------------|
| No                                                                               | 149 | 90.85       |
| Felt part of the heterosexual community                                          |     |             |
| Yes                                                                              | 130 | 79.27       |
| No                                                                               | 34  | 20.73       |
| Self-identifying as an HIV activist                                              |     |             |
| Definitely                                                                       | 76  | 46.34       |
| Somewhat                                                                         | 71  | 43.29       |
| No                                                                               | 17  | 10.37       |
| <b>Professional characteristics</b>                                              |     |             |
| Specialty                                                                        |     |             |
| HIV specialist (infectiologist, immunologist)                                    | 84  | 51.22       |
| General practitioner                                                             | 60  | 36.59       |
| Other (internist, etc.)                                                          | 20  | 12.20       |
| Number of years since graduating (1; 45 years)                                   | 164 | 21 (10; 28) |
| Academic or research involvement                                                 |     |             |
| Yes                                                                              | 64  | 39.02       |
| No                                                                               | 100 | 60.98       |
| Orientation of professional activity (0=care; 10=research)                       | 164 | 3 (2; 5)    |
| Participated in prevention/information actions organized by HIV associations     |     |             |
| Yes                                                                              | 67  | 40.85       |
| No                                                                               | 97  | 59.15       |
| Requested to collaborate in writing National HIV guidelines                      |     |             |
| Yes                                                                              | 26  | 15.85       |
| No                                                                               | 138 | 84.15       |
| <b>Sources of information about HIV cure research</b>                            |     |             |
| International conferences                                                        |     |             |
| Yes                                                                              | 108 | 65.85       |
| No                                                                               | 56  | 34.15       |
| National conferences                                                             |     |             |
| Yes                                                                              | 139 | 84.76       |
| No                                                                               | 25  | 15.24       |
| Meetings of learned societies                                                    |     |             |
| Yes                                                                              | 113 | 68.90       |
| No                                                                               | 51  | 31.10       |
| International scientific literature                                              |     |             |
| Yes                                                                              | 143 | 87.20       |
| No                                                                               | 21  | 12.80       |
| HIV associations' journals                                                       |     |             |
| Yes                                                                              | 71  | 43.29       |
| No                                                                               | 93  | 56.71       |
| Internet websites (ref. No)                                                      |     |             |
| Yes                                                                              | 97  | 59.15       |
| No                                                                               | 67  | 40.85       |
| Participation in multidisciplinary networks                                      |     |             |
| Yes                                                                              | 110 | 67.07       |
| No                                                                               | 54  | 32.93       |
| Number of sources of information used about HIV cure research (0; 7)             | 164 | 5 (4; 6)    |
| <b>Experience with clinical trials</b>                                           |     |             |
| Number of clinical trials physician participated in (0; 99)                      | 164 | 20 (10; 40) |
| Participated in clinical trials to help advance the work of previous generations |     |             |
| Totally agree                                                                    | 106 | 64.63       |
| Somewhat agree                                                                   | 46  | 28.05       |
| Somewhat disagree                                                                | 12  | 7.32        |

|                                                                                                         | N   | %*    |
|---------------------------------------------------------------------------------------------------------|-----|-------|
| General opinion about participating in a clinical trial                                                 |     |       |
| Rather reluctant                                                                                        | 2   | 1.22  |
| Depends of the characteristics of the clinical trial                                                    | 105 | 64.02 |
| Deferred to the department head's decision                                                              | 34  | 20.73 |
| Favorable                                                                                               | 23  | 14.02 |
| (Most recent clinical trial) Participated in order to advance research                                  |     |       |
| Yes                                                                                                     | 129 | 78.66 |
| No                                                                                                      | 35  | 21.34 |
| (Most recent clinical trial) Participated because department head asked them                            |     |       |
| Yes                                                                                                     | 45  | 27.44 |
| No                                                                                                      | 119 | 72.56 |
| (Most recent clinical trial) Participated out of interest                                               |     |       |
| Yes                                                                                                     | 110 | 67.07 |
| No                                                                                                      | 54  | 32.93 |
| (Most recent clinical trial) Considered to have adequately informed patients of benefits AND risks—6 mv |     |       |
| Definitely, for both benefits and risks                                                                 | 58  | 36.71 |
| Somewhat, for benefits and/or risks                                                                     | 90  | 56.96 |
| Not enough for benefits and/or risks                                                                    | 10  | 6.33  |
| <b>Viewpoints about HIV cure trials</b>                                                                 |     |       |
| Believed that an HIV cure would become available during their career span—6 mv                          |     |       |
| Yes                                                                                                     | 57  | 34.76 |
| No                                                                                                      | 67  | 40.85 |
| Do not know                                                                                             | 40  | 24.39 |
| <b>Physicians perceptions of their patients' level of concern about HIV-related difficulties</b>        |     |       |
| Shorter expected life—4 mv                                                                              |     |       |
| Very (concerned)                                                                                        | 31  | 19.38 |
| A little (concerned)                                                                                    | 87  | 54.38 |
| Not at all (concerned)                                                                                  | 42  | 26.25 |
| Side-effects related to current cART—4 mv                                                               |     |       |
| Very                                                                                                    | 77  | 48.13 |
| Not at all or a little                                                                                  | 83  | 51.88 |
| Severe fatigue—4 mv                                                                                     |     |       |
| Very                                                                                                    | 23  | 14.38 |
| A little                                                                                                | 97  | 60.63 |
| Not at all                                                                                              | 40  | 25.00 |
| Negative impact on health in general—4 mv                                                               |     |       |
| Very                                                                                                    | 63  | 39.38 |
| A little                                                                                                | 79  | 49.38 |
| Not at all                                                                                              | 18  | 11.25 |
| Uncertain future—4 mv                                                                                   |     |       |
| Very                                                                                                    | 63  | 39.38 |
| A little                                                                                                | 75  | 46.88 |
| Not at all                                                                                              | 22  | 13.75 |
| Risk of HIV transmission—4 mv                                                                           |     |       |
| Very                                                                                                    | 88  | 55.00 |
| A little                                                                                                | 57  | 35.63 |
| Not at all                                                                                              | 15  | 9.38  |
| Discrimination—4 mv                                                                                     |     |       |
| Very                                                                                                    | 136 | 85.00 |
| Not at all or a little                                                                                  | 24  | 15.00 |

|                                                                                    | N   | %*    |
|------------------------------------------------------------------------------------|-----|-------|
| Difficulties constructing a stable relationship with a main partner—4 mv           |     |       |
| Very                                                                               | 133 | 83.13 |
| Not at all or a little                                                             | 27  | 16.88 |
| Having to live with a secret—4 mv                                                  |     |       |
| Very                                                                               | 138 | 86.25 |
| Not at all or a little                                                             | 22  | 13.75 |
| Feeling unable to lead a normal life—4 mv                                          |     |       |
| Very                                                                               | 71  | 44.38 |
| A little                                                                           | 77  | 48.13 |
| Not at all                                                                         | 12  | 7.50  |
| Negative impact on sexuality—4 mv                                                  |     |       |
| Very                                                                               | 129 | 80.63 |
| Not at all or A little                                                             | 31  | 19.38 |
| Negative impact on professional life—4 mv                                          |     |       |
| Very                                                                               | 29  | 18.13 |
| A little                                                                           | 106 | 66.25 |
| Not at all                                                                         | 25  | 15.63 |
| Cost for society—4 mv                                                              |     |       |
| Very                                                                               | 42  | 26.25 |
| A little                                                                           | 74  | 46.25 |
| Not at all                                                                         | 44  | 27.50 |
| Out-of-pocket expenses—4 mv                                                        |     |       |
| Very                                                                               | 25  | 15.63 |
| A little                                                                           | 81  | 50.63 |
| Not at all                                                                         | 54  | 33.75 |
| <b>Physicians perceptions of patients' lives with cART</b>                         |     |       |
| Believed that having to take medication on a daily basis is easy for patients—4 mv |     |       |
| Yes                                                                                | 77  | 48.13 |
| No                                                                                 | 83  | 51.88 |
| Opinion of ART-related side effects for patients—4 mv                              |     |       |
| Not at all uncomfortable                                                           | 12  | 7.50  |
| A little uncomfortable                                                             | 126 | 78.75 |
| Very uncomfortable                                                                 | 22  | 13.75 |
| <b>Confidence in current cART</b>                                                  |     |       |
| Very confident in current cART—4 mv                                                |     |       |
| Yes                                                                                | 87  | 53.05 |
| No                                                                                 | 77  | 46.95 |
| Believed that current ART would continue to be effective over the long term—4 mv   |     |       |
| Yes                                                                                | 142 | 86.59 |
| No                                                                                 | 22  | 13.41 |

\* or median (IQR).  
mv: missing values.

**Table S2.** Factors associated with the reluctance score: results from univariable linear regressions (ANRS-APSEC study, n=164).

|                                               | $\beta$ | 95% CI | <i>p</i> | <i>p-glob</i> |
|-----------------------------------------------|---------|--------|----------|---------------|
| Identity and sociodemographic characteristics |         |        |          |               |

|                                                                                                                                       | $\beta$ | 95% CI        | <i>p</i> | <i>p-glob</i> |
|---------------------------------------------------------------------------------------------------------------------------------------|---------|---------------|----------|---------------|
| Gender (ref. Man)                                                                                                                     |         |               |          |               |
| Woman                                                                                                                                 | 0.03    | [-0.28;0.34]  | 0.87     | 0.87          |
| Age [29;74 years]                                                                                                                     | -0.01   | [-0.02;0.01]  | 0.45     | 0.45          |
| In a relationship (ref. No)                                                                                                           |         |               |          |               |
| Yes                                                                                                                                   | 0.03    | [-0.35;0.42]  | 0.86     | 0.86          |
| Felt part of the LGBT community (ref. No)                                                                                             |         |               |          |               |
| Yes                                                                                                                                   | 0.21    | [-0.33;0.74]  | 0.45     | 0.45          |
| Felt part of the heterosexual community (ref. No)                                                                                     |         |               |          |               |
| Yes                                                                                                                                   | -0.08   | [-0.46;0.30]  | 0.67     | 0.67          |
| Self-identifying as an HIV activist (ref. Definitely)                                                                                 |         |               |          |               |
| Somewhat                                                                                                                              | 0.26    | [-0.06;0.59]  | 0.11     | 0.28          |
| No                                                                                                                                    | 0.13    | [-0.40;0.66]  | 0.62     |               |
| Definitely identifying themselves as an HIV activist (ref. No)                                                                        |         |               |          |               |
| Yes                                                                                                                                   | -0.24   | [-0.55;0.07]  | 0.13     | 0.13          |
| Professional characteristics                                                                                                          |         |               |          |               |
| Specialty (ref. HIV specialist (infectiologist, immunologist))                                                                        |         |               |          |               |
| General practitioner                                                                                                                  | -0.17   | [-0.51;0.16]  | 0.30     | 0.43          |
| Other (internist, etc.)                                                                                                               | -0.26   | [-0.75;0.23]  | 0.30     |               |
| Number of years since graduating [1;45 years]                                                                                         | -0.01   | [-0.02;0.00]  | 0.14     | 0.14          |
| Academic or research involvement (ref. No)                                                                                            |         |               |          |               |
| Yes                                                                                                                                   | -0.12   | [-0.44;0.20]  | 0.45     | 0.45          |
| Orientation of professional activity [0=care;10=research]                                                                             | -0.12   | [-0.19;-0.05] | 0.001    | 0.001         |
| Participated in prevention/information actions organized by HIV associations (ref. No)                                                |         |               |          |               |
| Yes                                                                                                                                   | -0.43   | [-0.74;-0.12] | 0.01     | 0.01          |
| Requested to collaborate in writing National HIV guidelines (ref. No)                                                                 |         |               |          |               |
| Yes                                                                                                                                   | -0.35   | [-0.77;0.07]  | 0.10     | 0.10          |
| Sources of information used about HIV cure research                                                                                   |         |               |          |               |
| International conferences (ref. No)                                                                                                   |         |               |          |               |
| Yes                                                                                                                                   | -0.14   | [-0.47;0.19]  | 0.40     | 0.40          |
| National conferences (ref. No)                                                                                                        |         |               |          |               |
| Yes                                                                                                                                   | -0.24   | [-0.67;0.19]  | 0.27     | 0.27          |
| Meetings of learned societies (ref. No)                                                                                               |         |               |          |               |
| Yes                                                                                                                                   | -0.21   | [-0.54;0.12]  | 0.22     | 0.22          |
| International scientific literature (ref. No)                                                                                         |         |               |          |               |
| Yes                                                                                                                                   | -0.48   | [-0.94;-0.02] | 0.04     | 0.04          |
| HIV associations' journals (ref. No)                                                                                                  |         |               |          |               |
| Yes                                                                                                                                   | -0.30   | [-0.61;0.01]  | 0.06     | 0.06          |
| Internet websites (ref. No)                                                                                                           |         |               |          |               |
| Yes                                                                                                                                   | -0.14   | [-0.45;0.17]  | 0.38     | 0.38          |
| Participation in multidisciplinary networks (ref. No)                                                                                 |         |               |          |               |
| Yes                                                                                                                                   | -0.13   | [-0.46;0.20]  | 0.43     | 0.43          |
| Number of sources of information about HIV cure research                                                                              | -0.15   | [-0.26;-0.04] | 0.01     | 0.01          |
| Experience with clinical trials                                                                                                       |         |               |          |               |
| Number of clinical trials physician participated in [0;99]                                                                            | -0.01   | [-0.02;0.00]  | 0.01     | 0.01          |
| Agreement with statement that participation in clinical trials helps to advance the work of previous generations (ref. Totally agree) |         |               |          |               |
| Somewhat agree                                                                                                                        | 0.24    | [-0.11;0.58]  | 0.18     | 0.08          |
| Somewhat disagree                                                                                                                     | -0.47   | [-1.07;0.12]  | 0.12     |               |

|                                                                                                                                                                              | $\beta$ | 95% CI        | $p$   | $p$ -glob |
|------------------------------------------------------------------------------------------------------------------------------------------------------------------------------|---------|---------------|-------|-----------|
| General attitude about participating in a clinical trial                                                                                                                     |         |               |       |           |
| Favorable (ref. No)                                                                                                                                                          |         |               |       |           |
| Yes                                                                                                                                                                          | -0.65   | [-1.08;-0.21] | 0.004 | 0.004     |
| Rather reluctant (ref. No)                                                                                                                                                   |         |               |       |           |
| Yes                                                                                                                                                                          | 0.36    | [-1.05;1.77]  | 0.62  | 0.62      |
| Depends on characteristics of the clinical trial                                                                                                                             |         |               |       |           |
| Yes                                                                                                                                                                          | 0.14    | [-0.18;0.46]  | 0.40  | 0.40      |
| Deferred to the department head's decision                                                                                                                                   |         |               |       |           |
| Yes                                                                                                                                                                          | 0.25    | [-0.12;0.63]  | 0.19  | 0.19      |
| Reason for participation in the most recent clinical trial                                                                                                                   |         |               |       |           |
| In order to advance research (ref. No)                                                                                                                                       |         |               |       |           |
| Yes                                                                                                                                                                          | -0.24   | [-0.62;0.13]  | 0.20  | 0.202     |
| Because department head asked them (ref. No)                                                                                                                                 |         |               |       |           |
| Yes                                                                                                                                                                          | 0.23    | [-0.11;0.58]  | 0.18  | 0.18      |
| Out of interest (ref. No)                                                                                                                                                    |         |               |       |           |
| Yes                                                                                                                                                                          | -0.04   | [-0.37;0.28]  | 0.79  | 0.79      |
| (Most recent clinical trial) Considered to have adequately informed patients of both the benefits and risks of the trial (ref. Definitely, for both benefits and risks)—6 mv |         |               |       | 0.04      |
| Somewhat, for benefits or/and risks                                                                                                                                          | 0.37    | [0.04;0.70]   | 0.03  |           |
| Not enough for risks or/and benefits                                                                                                                                         | 0.63    | [-0.04;1.30]  | 0.07  |           |
| Believed an HIV cure would become available during their career span (ref. No)                                                                                               |         |               |       |           |
| Yes                                                                                                                                                                          | -0.25   | [-0.61;0.10]  | 0.15  | 0.06      |
| Do not know                                                                                                                                                                  | 0.23    | [-0.16;0.62]  | 0.25  |           |
| Physicians' perceptions of their patients' level of concern about HIV-related difficulties                                                                                   |         |               |       |           |
| Shorter expected life (ref. Not at all)—4 mv                                                                                                                                 |         |               |       |           |
| A little (concerned)                                                                                                                                                         | 0.19    | [-0.17;0.56]  | 0.29  | 0.57      |
| Very (concerned)                                                                                                                                                             | 0.11    | [-0.35;0.56]  | 0.64  |           |
| Side effects related to actual ART (ref. Not at all or a little)—4 mv                                                                                                        |         |               |       |           |
| Very                                                                                                                                                                         | -0.07   | [-0.37;0.24]  | 0.66  | 0.66      |
| Severe fatigue (ref. Not at all)—4 mv                                                                                                                                        |         |               |       |           |
| A little                                                                                                                                                                     | -0.23   | [-0.59;0.13]  | 0.22  | 0.29      |
| Very                                                                                                                                                                         | 0.06    | [-0.45;0.56]  | 0.83  |           |
| Negative impact on health in general (ref. Not at all)—4 mv                                                                                                                  |         |               |       |           |
| A little                                                                                                                                                                     | 0.28    | [-0.22;0.79]  | 0.27  | 0.50      |
| Very                                                                                                                                                                         | 0.29    | [-0.22;0.81]  | 0.26  |           |
| Uncertain future (ref. Not at all)—4 mv                                                                                                                                      |         |               |       |           |
| A little                                                                                                                                                                     | 0.29    | [-0.17;0.76]  | 0.22  | 0.35      |
| Very                                                                                                                                                                         | 0.35    | [-0.13;0.82]  | 0.15  |           |
| Risk of HIV transmission (ref. Not at all)—4 mv                                                                                                                              |         |               |       |           |
| A little                                                                                                                                                                     | 0.16    | [-0.39;0.71]  | 0.58  | 0.04      |
| Very                                                                                                                                                                         | 0.51    | [-0.02;1.04]  | 0.06  |           |
| Discrimination (ref. Not at all or a little)—4 mv                                                                                                                            |         |               |       |           |
| Very                                                                                                                                                                         | -0.10   | [-0.53;0.33]  | 0.65  | 0.65      |
| Difficulties constructing a stable relationship with a main partner (ref. Not at all or a little)—4 mv                                                                       |         |               |       |           |
| Very                                                                                                                                                                         | -0.18   | [-0.59;0.22]  | 0.38  | 0.38      |
| Having to live with a secret (ref. Not at all or a little)—4 mv                                                                                                              |         |               |       |           |
| Very                                                                                                                                                                         | -0.34   | [-0.78;0.10]  | 0.13  | 0.13      |

|                                                                                              | $\beta$ | 95% CI        | $p$  | $p\text{-glob}$ |
|----------------------------------------------------------------------------------------------|---------|---------------|------|-----------------|
| Feeling unable to lead a normal life (ref. Not at all)—4 mv                                  |         |               |      |                 |
| A little                                                                                     | 0.17    | [-0.43;0.77]  | 0.57 | 0.84            |
| Very                                                                                         | 0.17    | [-0.43;0.77]  | 0.58 |                 |
| Negative impact on sexuality (ref. Not at all or a little)—4 mv                              |         |               |      |                 |
| Very                                                                                         | 0.13    | [-0.26;0.51]  | 0.51 | 0.51            |
| Negative impact on professional life (ref. Not at all)—4 mv                                  |         |               |      |                 |
| A little                                                                                     | 0.30    | [-0.12;0.73]  | 0.16 | 0.06            |
| Very                                                                                         | 0.63    | [0.11;1.15]   | 0.02 |                 |
| Cost for society (ref. Not at all)—4 mv                                                      |         |               |      |                 |
| A little                                                                                     | -0.08   | [-0.45;0.29]  | 0.68 | 0.91            |
| Very                                                                                         | -0.07   | [-0.49;0.34]  | 0.73 |                 |
| Out-of-pocket expenses (ref. Not at all)—4 mv                                                |         |               |      |                 |
| A little                                                                                     | -0.14   | [-0.48;0.20]  | 0.42 | 0.72            |
| Very                                                                                         | -0.06   | [-0.52;0.41]  | 0.81 |                 |
| Perception of patients' life with cART                                                       |         |               |      |                 |
| Believed that having to take medication on a daily basis is easy for patients (ref. No)—4 mv |         |               |      | 0.74            |
| Yes                                                                                          | 0.05    | [-0.25;0.36]  | 0.74 |                 |
| Opinion on ART-related side effects for patients (ref. Not at all uncomfortable)—4 mv        |         |               |      | 0.71            |
| A little uncomfortable                                                                       | 0.00    | [-0.58;0.58]  | 1.00 |                 |
| Very uncomfortable                                                                           | -0.19   | [-0.88;0.51]  | 0.60 |                 |
| Confidence in current cART                                                                   |         |               |      |                 |
| Very confident in current cART (ref. No)                                                     |         |               |      | 0.05            |
| Yes                                                                                          | -0.31   | [-0.62;-0.01] | 0.05 |                 |
| Believed that current cART will continue to be effective over the long term (ref. No)        |         |               |      | 0.11            |
| Yes                                                                                          | -0.37   | [-0.82;0.08]  | 0.11 |                 |

mv: missing
